Promotion of international exchanges of medical students and teachers, lectures and clinical teaching by traveling teams of physicians;

Development of an international program to improve occupational health services;

Promotion of a freer flow of proven therapeutic agents throughout the world by urging removal of unwarranted trade restrictions and arbitrary licensing requirements in certain countries;

Promotion of medical research, by promoting national pharmacopoeias and defending the rights of individuals discovering new drugs and agents to name them;

Development of an international emblem (in conference with the International Committee of the Red Cross and the International Committee on Military Medicine and Pharmacy) for identification and protection of medical units and civilian physicians engaged in civil defense in war time; and promulgation of regulations stating the rights and duties of such physicians;

Formulation of plans for a central repository of medical credentials, to enable qualified physicians of every country to file proof of their identity and qualifications with a safe and authoritative international source;

Conducting useful studies of many subjects of world-wide interest to physicians, such as post-graduate medical education, hospital facilities, cult practices, medical advertising, and effects of social security legislation on medical practice.

The World Medical Association brings you solid benefits as well as the satisfaction of taking part in the international affairs of our profession. You can help make its work more effective by joining the U. S. Committee. The nominal dues of Active Membership in the U. S. Committee are only \$10.00 each year. The Committee is seeking to double its present membership of 5,000 American physicians this year. The objectives of W.M.A. are your objectives. It is your voice in world medical affairs. We invite you to add your name and your voice in guiding and strengthening this great organization.

LOUIS H. BAUER, M.D.  
*Secretary General*  
*The World Medical Association*

## RESIDENCY REVIEW COMMITTEE IN ANESTHESIOLOGY

In March, 1957 the A.M.A. Council on Medical Education and Hospitals and the American Board of Anesthesiology established a Residency Review Committee in Anesthesiology. At the present time 18 of the 19 specialty boards and the American Academy of General Practice have established Residency Review Committees. The committee in anesthesiology is composed of three members representing and appointed by the Council, three members representing and appointed by the American Board of Anesthesiology, and the Secretary of the committee who is a member of the Council staff. Appointments will be for three years after the initial phase, and a member may be reappointed.

Meetings of the committee will be held at approximate six month intervals. The members of the committee representing the A.M.A. Council are as follows: Dr. John Adriani, Dr. William E. Bageant and Dr. Richard H. Barrett. The representatives of the Board serving on this committee are: Dr. Stuart C. Cullen, Dr. Albert Faulconer and Dr. Forrest E. Leffingwell. Dr. Willard V. Thompson, Assistant Secretary of the Council on Medical Education and Hospitals is the Secretary of the committee and all pertinent correspondence should be sent directly to him.
